# Supplementary material for: Early evening light mitigates sleep compromising physiological and alerting responses to subsequent late evening light
Source: PubMed Central journal article supplement (PMC6831674; doi:10.1038/s41598-019-52352-w), 2019-11-05
Supplement: 41598_2019_52352_MOESM1_ESM.pdf [file 41598_2019_52352_MOESM1_ESM.pdf]

# **Early evening light mitigates sleep compromising physiological and alerting responses to subsequent late evening light**

Marije te Kulve<sup>1,2</sup>, Luc J.M. Schlangen<sup>3</sup>, Wouter D. van Marken Lichtenbelt<sup>1</sup>

*1 Department of Human Biology & Movement Sciences, NUTRIM, Maastricht University, The Netherlands.*

*2 bba indoor environmental consultancy, The Hague, The Netherlands*

*3 Signify, Eindhoven, The Netherlands*

**Supplementary Figures**

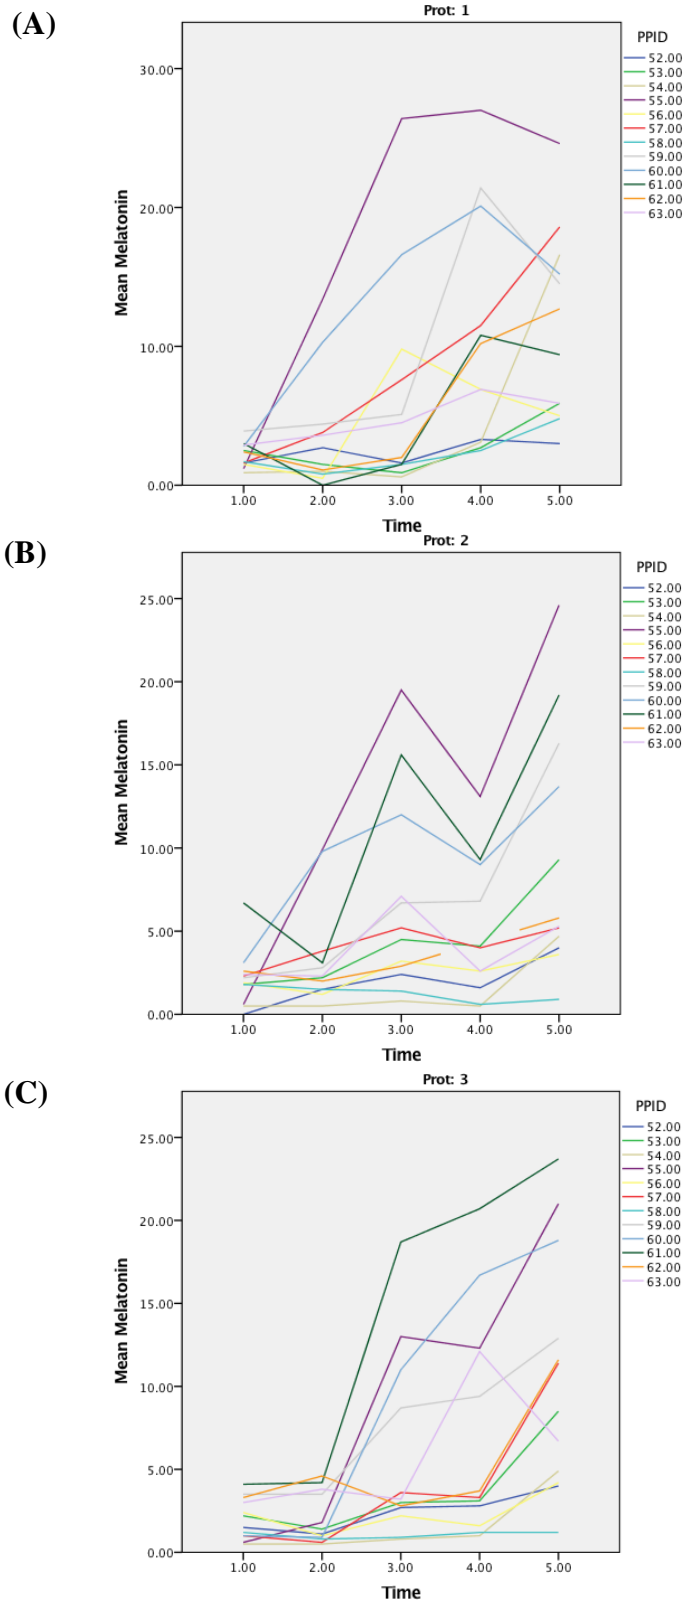

**Supplementary Figure 1.** Individual time-course of the melatonin concentration (pg/l) per session. (A) Melatonin concentration during dim light session. (B) Melatonin concentration during the 1 hour light session. (C) Melatonin concentration during the prior light exposure session. Each coloured line represents a participant.
